# Supplementary material
Source: Springer Nature journal article supplement (https://www.springermedizin.de/resource/supplementary/13618_2013_71_MOESM1_ESM.pdf/9681094)
Supplement: MOESM1 [file 9681094]

# Hydrogen

## TIMELINE

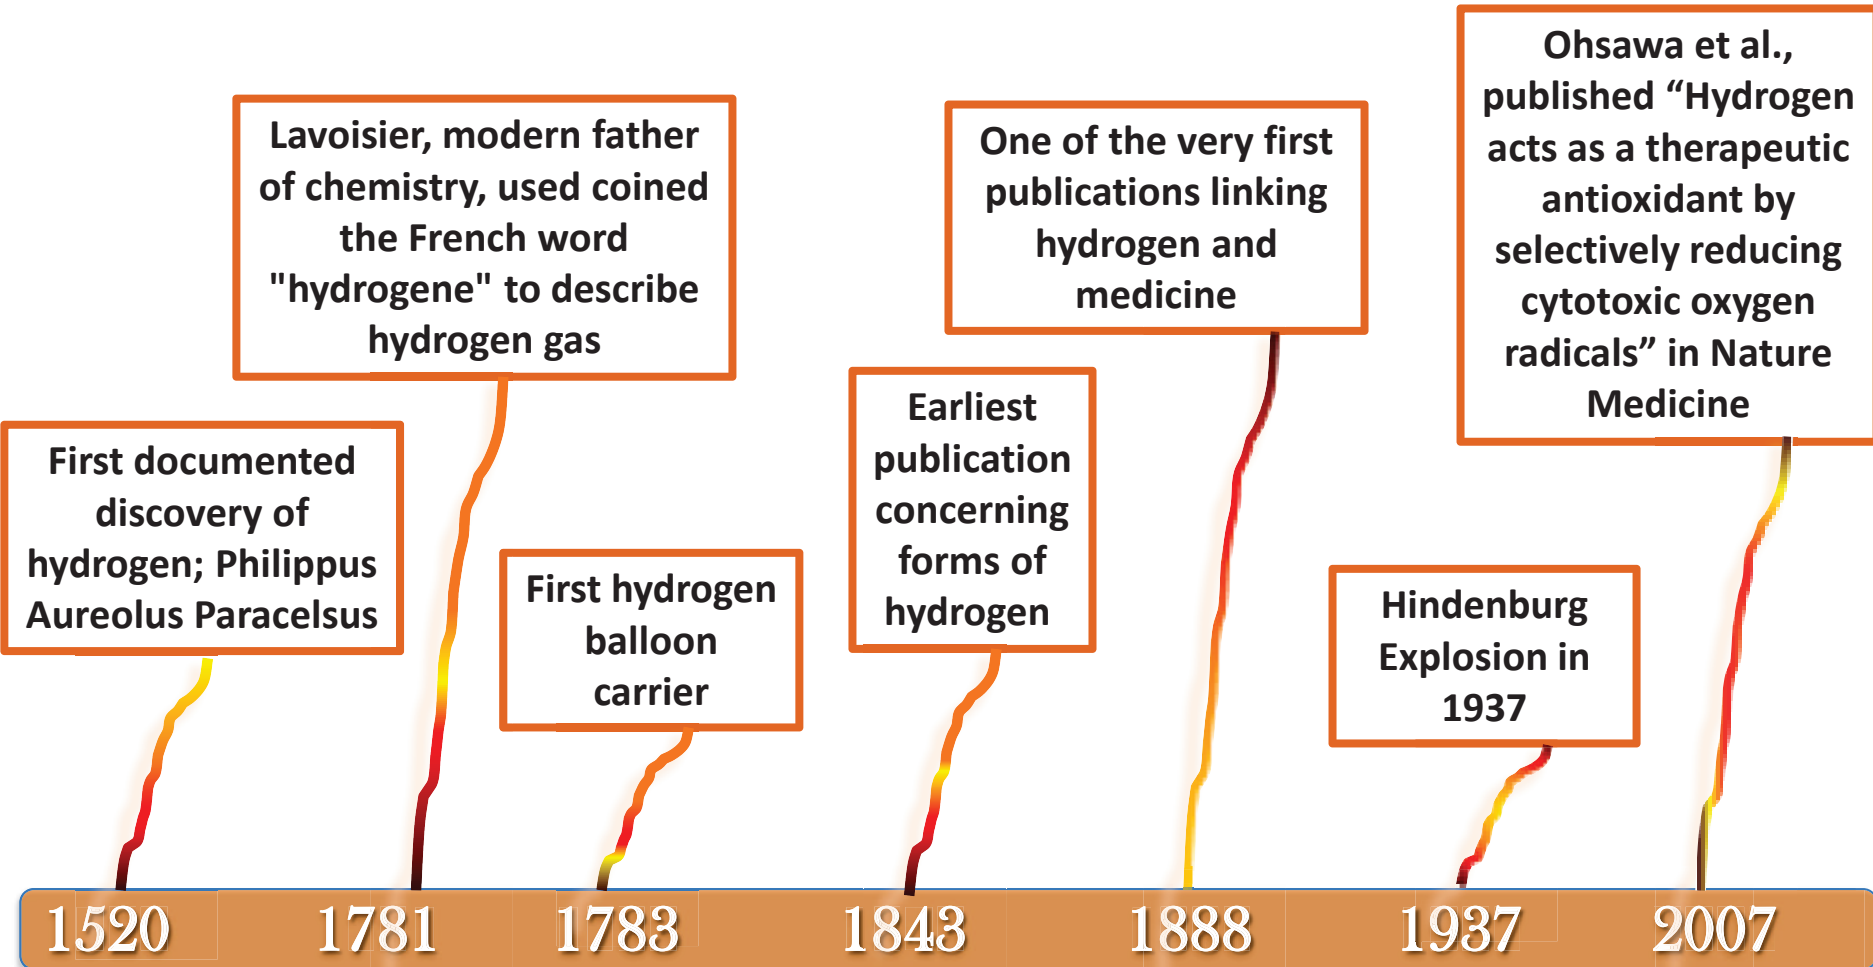

Lavoisier, modern father of chemistry, used coined the French word "hydrogene" to describe hydrogen gas

One of the very first publications linking hydrogen and medicine

Ohsawa et al., published "Hydrogen acts as a therapeutic antioxidant by selectively reducing cytotoxic oxygen radicals" in Nature Medicine

First documented discovery of hydrogen; Philippus Aureolus Paracelsus

First hydrogen balloon carrier

Earliest publication concerning forms of hydrogen

Hindenburg Explosion in 1937

1520

1781

1783

1843

1888

1937

2007
